# Supplementary material
Source: Royal Society of Chemistry journal article supplement (doi:10.1039/d6cp00680a)
Supplement: d6cp00680a1.pdf [file d6cp00680a1.pdf]

## Supplementary Information

### **Monitoring the effects of salt background, alkalinity and temperature on MS2 bacteriophage behaviour *via* solvatochromism, metachromasia and chemical kinetics**

Anna Laguta<sup>1,2</sup>

<sup>1</sup> University of Chemistry and Technology Prague, Technická 5, 166 28 Prague 6, Czech Republic

<sup>2</sup> V. N. Karazin Kharkiv National University, Svoboda Square 4, 61022 Kharkiv, Ukraine  
[\\*laguta@karazin.ua](mailto:*laguta@karazin.ua)

Table S1. Some characterization of the 129 residues protein of the MS2 capsid

| Residues        | Number per protein <sup>1</sup> | Character at pH = 7-9 <sup>2</sup>  | Hydropathy index <sup>3</sup> |
|-----------------|---------------------------------|-------------------------------------|-------------------------------|
| V Valine        | 14                              | Aliphatic, Nonpolar, Neutral        | 4.2                           |
| A Alanine       | 14                              | Aliphatic, Nonpolar, Neutral        | 1.8                           |
| S Serine        | 13                              | Hydroxylic, Polar, Neutral          | -0.8                          |
| N Asparagine    | 10                              | Amide, Polar, Neutral               | -3.5                          |
| G Glycine       | 9                               | Aliphatic, Nonpolar, Neutral        | -0.4                          |
| T Threonine     | 9                               | Hydroxylic, Polar, Neutral          | -0.7                          |
| I Isoleucine    | 8                               | Aliphatic, Nonpolar, Neutral        | 4.5                           |
| L Leucine       | 7                               | Aliphatic, Nonpolar, Neutral        | 3.8                           |
| K Lysine        | 6                               | Cation, Brønsted acid, Positive     | -3.9                          |
| P Proline       | 6                               | Cyclic, Nonpolar, Neutral           | -1.6                          |
| Q Glutamine     | 6                               | Amide, Polar, Neutral               | -3.5                          |
| E Glutamate     | 5                               | Anion Brønsted base, Negative       | -3.5                          |
| R Arginine      | 4                               | Fixed cation, Basic polar, Positive | -4.5                          |
| D Aspartate     | 4                               | Anion, Brønsted base, Negative      | -3.5                          |
| F Phenylalanine | 4                               | Aromatic, Nonpolar, Neutral         | 2.8                           |
| Y Tyrosine      | 4                               | Aromatic, Brønsted acid             | -1.3                          |
| C Cysteine      | 2                               | Thiol, Brønsted acid                | 2.5                           |
| M Methionine    | 2                               | Thioether, Nonpolar, Neutral        | 1.9                           |
| W Tryptophan    | 2                               | Aromatic, Nonpolar, Neutral         | -0.9                          |

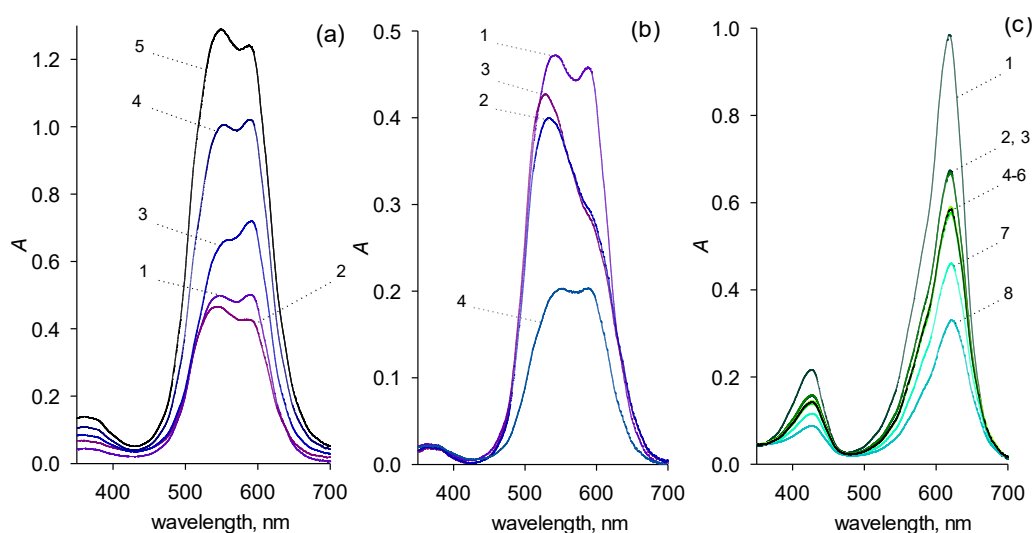

**Fig. S1.** Absorption spectra of CV (a and b) and MG (c) in a solution of  $4 \times 10^{15}$  PFU/mL MS2 at 25 °C and:

(a)  $l = 1$  cm;  $c_{CV} = 1 \times 10^{-5}$  mol/L and without added alkali (1);  $c_{CV} = 1 \times 10^{-5}$  mol/L and  $c_{NaOH} = 2$  mM (2);  $c_{CV} = 2 \times 10^{-5}$  mol/L and  $c_{NaOH} = 2$  mM (3);  $c_{CV} = 3 \times 10^{-5}$  mol/L and  $c_{NaOH} = 2$  mmol/L (4);  $c_{CV} = 4 \times 10^{-5}$  mol/L and  $c_{NaOH} = 2$  mmol/L (5);

(b)  $c_{CV} = 1 \times 10^{-4}$  mol/L;  $l = 0.1$  cm; without added alkali (1);  $c_{NaOH} = 2$  mmol/L (2);  $c_{NaOH} = 4$  mmol/L (3);  $c_{NaOH} = 7.5$  mmol/L (4);

(c)  $l = 1$  cm; without added alkali (1);  $c_{NaOH} = 0.6$  mmol/L (2);  $c_{NaOH} = 0.9$  mM (3);  $c_{NaOH} = 1.3$  mmol/L (4);  $c_{NaOH} = 1.8$  mmol/L (5);  $c_{NaOH} = 2.7$  mmol/L (6);  $c_{NaOH} = 3.5$  mM (7);  $c_{NaOH} = 4.4$  mmol/L (8). The decrease in absorption is associated with alkaline fading.

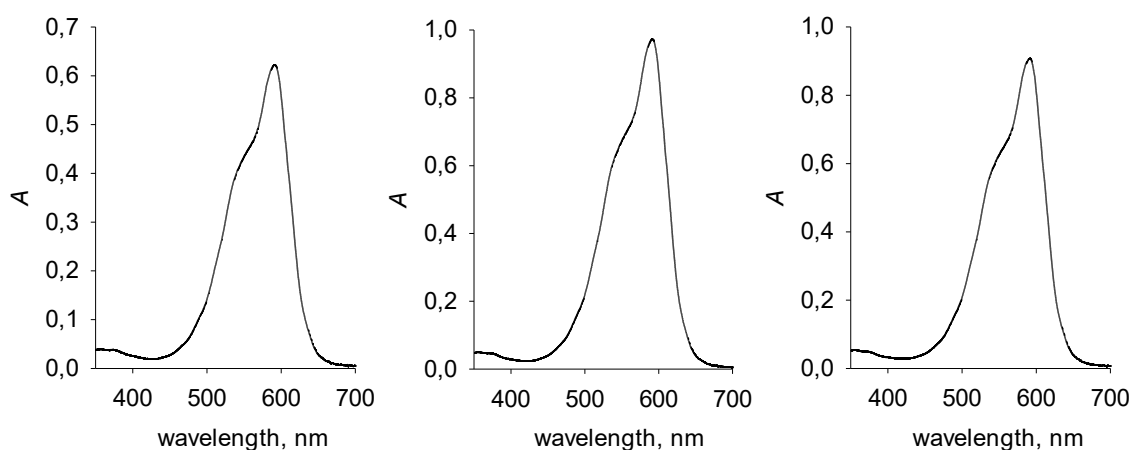

**Fig. S2.** Absorption spectra of  $CV^+$  in a solution of  $4 \times 10^{15}$  PFU/mL MS2 and (left-to-right) 1 mM; 10 mmol/L; and 50 mmol/L  $CaCl_2$ ; without added alkali.

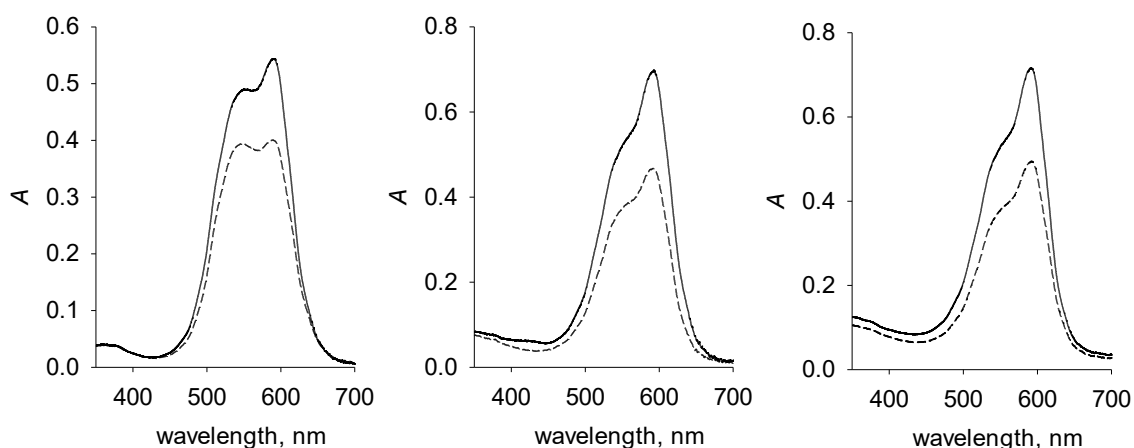

**Fig. S3.** Absorption spectra of  $CV^+$  in a solution of  $4 \times 10^{15}$  PFU/mL MS2 and (left-to-right) 1 mmol/L; 10 mmol/L; and 50 mmol/L RbCl; solid line: without added alkali; dashed line: at  $c_{NaOH} = 1$  mmol/L.

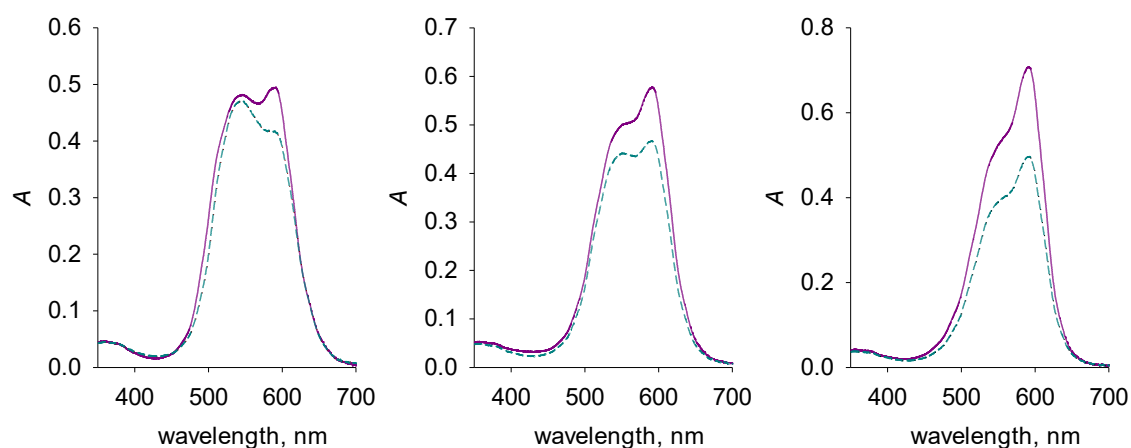

**Fig. S4.** Absorption spectra of CV in a solution of  $4 \times 10^{15}$  PFU/mL MS2 and (left-to-right) 1 mmol/L; 10 mmol/L; and 50 mmol/L KCl; solid line: without added alkali; dashed line: at  $c_{NaOH} = 1$  mmol/L.

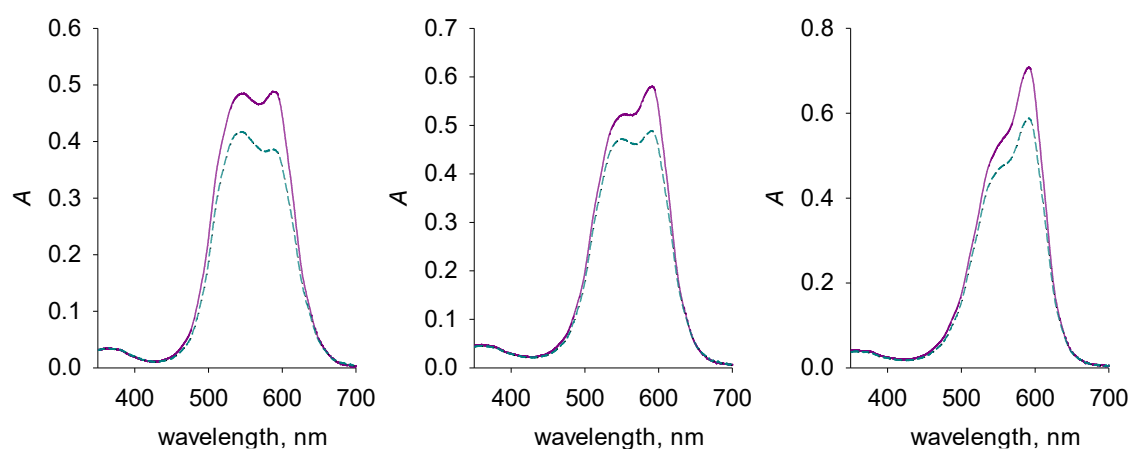

**Fig. S5.** Absorption spectra of CV in a solution of  $4 \times 10^{15}$  PFU/mL MS2 and (left-to-right) 1 mmol/L; 10 mmol/L; and 50 mmol/L NaCl; solid line: without added alkali; dashed line: at  $c_{NaOH} = 1$  mmol/L.

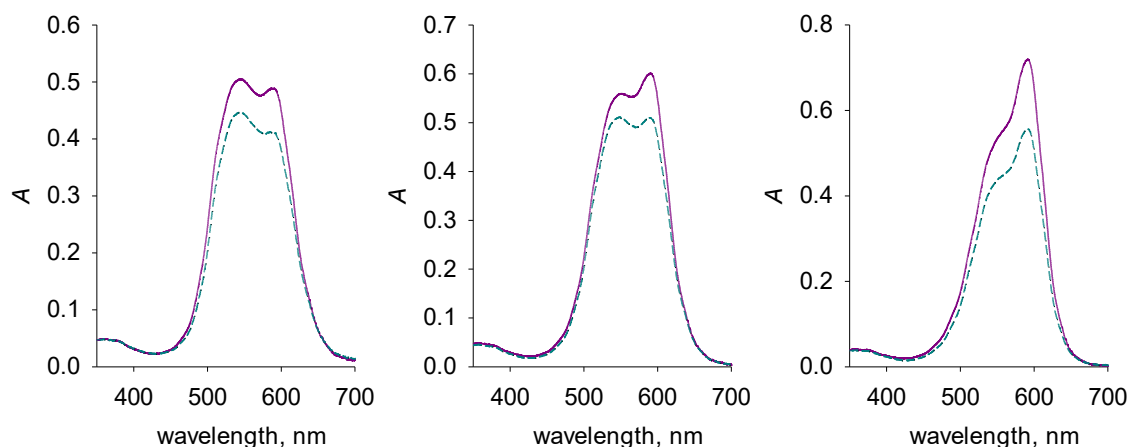

**Fig. S6.** Absorption spectra of CV in a solution of  $4 \times 10^{15}$  PFU/mL MS2 and (left-to-right) 1 mmol/L; 10 mmol/L; and 50 mmol/L NaI; solid line: without added alkali; dashed line: at  $c_{\text{NaOH}} = 1$  mmol/L.

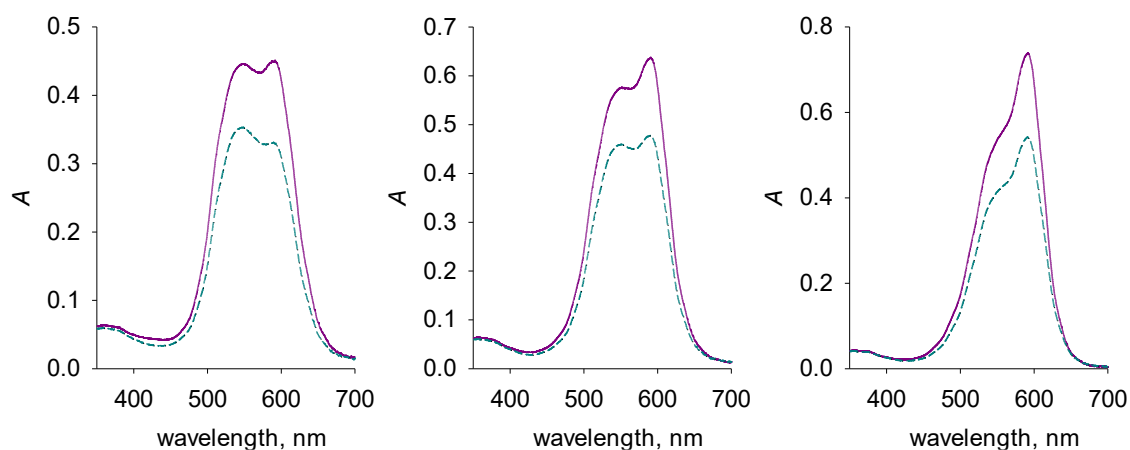

**Fig. S7.** Absorption spectra of CV in a solution of  $4 \times 10^{15}$  PFU/mL MS2 and (left-to-right) 1 mmol/L; 10 mmol/L; and 50 mmol/L RbCl; solid line: without added alkali; dashed line: at  $c_{\text{NaOH}} = 1$  mmol/L.

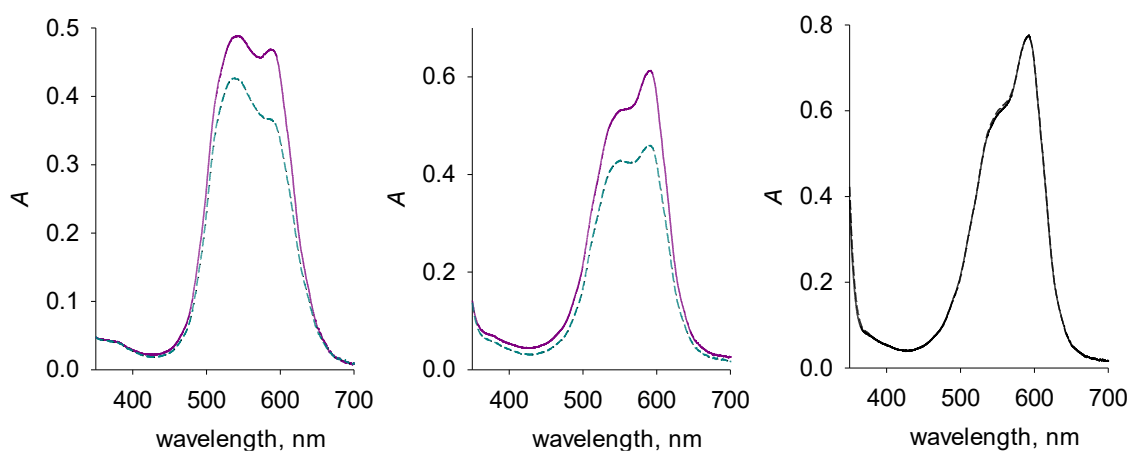

**Fig. S8.** Absorption spectra of CV in a solution of  $4 \times 10^{15}$  PFU/mL MS2 and (left-to-right) 1 mmol/L; 10 mmol/L; and 50 mmol/L NaSal; solid line: without added alkali; dashed line: at  $c_{\text{NaOH}} = 1$  mmol/L.

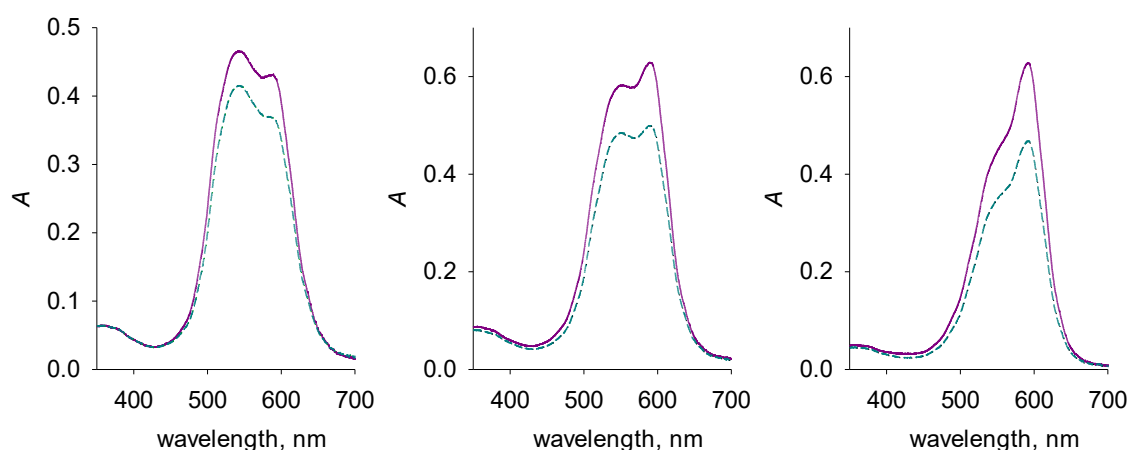

**Fig. S9.** Absorption spectra of CV in a solution of  $4 \times 10^{15}$  PFU/mL MS2 and (left-to-right) 1 mmol/L; 10 mmol/L; and 50 mmol/L NaBut; solid line: without added alkali; dashed line: at  $c_{\text{NaOH}} = 1$  mmol/L.

Table S2. Absorption maxima of MG in solutions of  $4 \times 10^{15}$  PFU/mL MS2 and salts without added alkali and at  $c_{\text{NaOH}} = 0.2$  mmol/L. The shape of the spectrum does not change. Cation of MG has  $\lambda_{\text{max}}$  at 614 nm in water<sup>4</sup> and 619 nm in salt-free MS2 system.

| Salts                         | without                     | with   | Salts                          | without                     | with   |
|-------------------------------|-----------------------------|--------|--------------------------------|-----------------------------|--------|
|                               | alkali                      | alkali |                                | alkali                      | alkali |
|                               | $\lambda_{\text{max}}$ , nm |        |                                | $\lambda_{\text{max}}$ , nm |        |
| 0.001 mol/L CaCl <sub>2</sub> | 617                         | –      | 0.0005 mol/L NaNO <sub>3</sub> | 619                         | 619    |
| 0.01 mol/L CaCl <sub>2</sub>  | 617                         | –      | 0.001 mol/L NaNO <sub>3</sub>  | 619                         | 619    |
| 0.05 mol/L CaCl <sub>2</sub>  | 618                         | 618    | 0.01 mol/L NaNO <sub>3</sub>   | 618                         | 619    |
| 0.001 mol/L RbCl              | 617                         | 617    | 0.05 mol/L NaNO <sub>3</sub>   | 618                         | 619    |
| 0.01 mol/L RbCl               | 617                         | 618    | 0.1 mol/L NaNO <sub>3</sub>    | 619                         | 618    |
| 0.05 mol/L RbCl               | 619                         | 618    | 0.001 mol/L NaAc               | 619                         | 617    |
| 0.001 mol/L KCl               | 621                         | 621    | 0.01 mol/L NaAc                | 618                         | 618    |
| 0.01 mol/L KCl                | 617                         | 618    | 0.05 mol/L NaAc                | 618                         | 618    |
| 0.05 mol/L KCl                | 620                         | 619    | 0.001 mol/L NaSal              | 618                         | 618    |
| 0.001 mol/L NaCl              | 620                         | 620    | 0.01 mol/L NaSal               | 618                         | 618    |
| 0.01 mol/L NaCl               | 620                         | 619    | 0.05 mol/L NaSal               | 617                         | 618    |
| 0.05 mol/L NaCl               | 618                         | 618    | 0.001 mol/L NaBut              | 618                         | 618    |
| 0.1 mol/L NaCl                | 616                         | 616    | 0.01 mol/L NaBut               | 618                         | 617    |
| 0.001 mol/L NaI               | 620                         | 620    | 0.05 mol/L NaBut               | 616                         | 617    |
| 0.01 mol/L NaI                | 619                         | 619    | 0.001 mol/L NaGly              | 618                         | 617    |
| 0.05 mol/L NaI                | 618                         | 618    | 0.01 mol/L NaGly               | 618                         | 618    |
| –                             | –                           | –      | 0.05 mol/L NaGly               | 618                         | 618    |

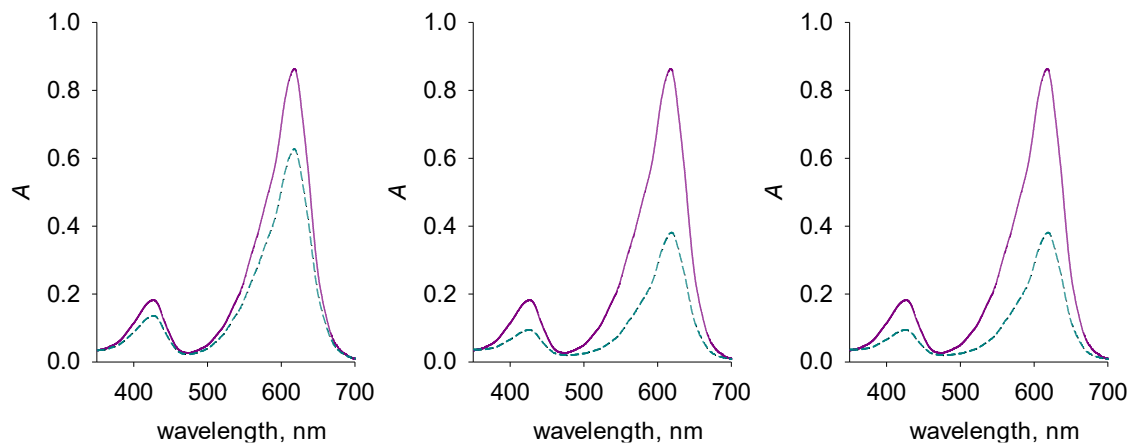

**Fig. S10.** Absorption spectra of MG in a solution of  $4 \times 10^{15}$  PFU/mL MS2 and (left-to-right) 1 mmol/L; 10 mmol/L; and 50 mmol/L RbCl; solid line: without added alkali; dashed line: at  $c_{\text{NaOH}} = 0.2$  mmol/L.

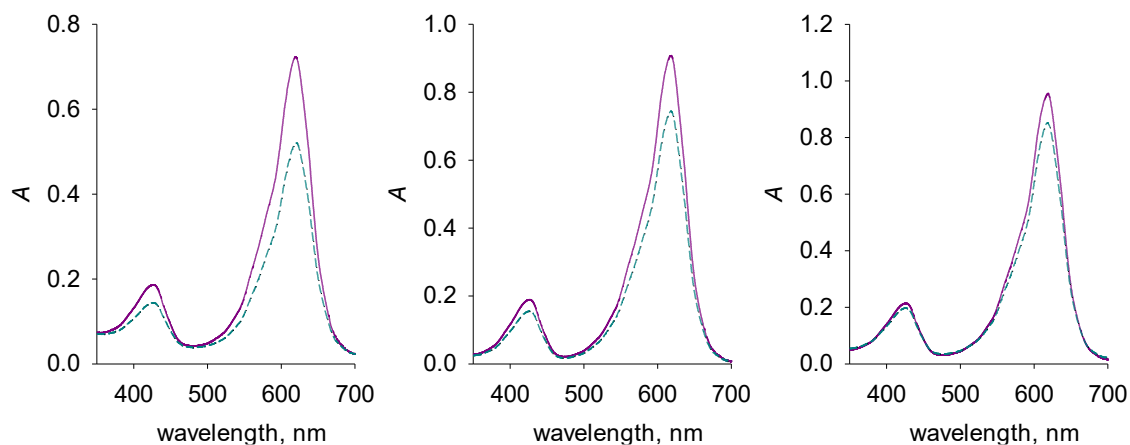

**Fig. S11.** Absorption spectra of MG in a solution of  $4 \times 10^{15}$  PFU/mL MS2 and (left-to-right) 1 mmol/L; 10 mmol/L; and 50 mmol/L KCl; solid line: without added alkali; dashed line: at  $c_{\text{NaOH}} = 0.2$  mmol/L.

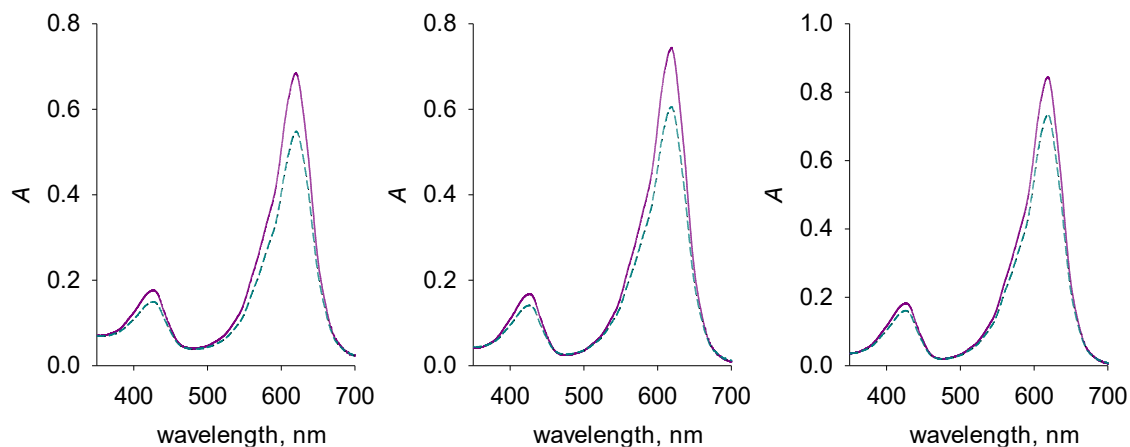

**Fig. S12.** Absorption spectra of MG in a solution of  $4 \times 10^{15}$  PFU/mL MS2 and (left-to-right) 1 mmol/L; 10 mmol/L; and 50 mmol/L NaCl; solid line: without added alkali; dashed line: at  $c_{\text{NaOH}} = 0.2$  mmol/L.

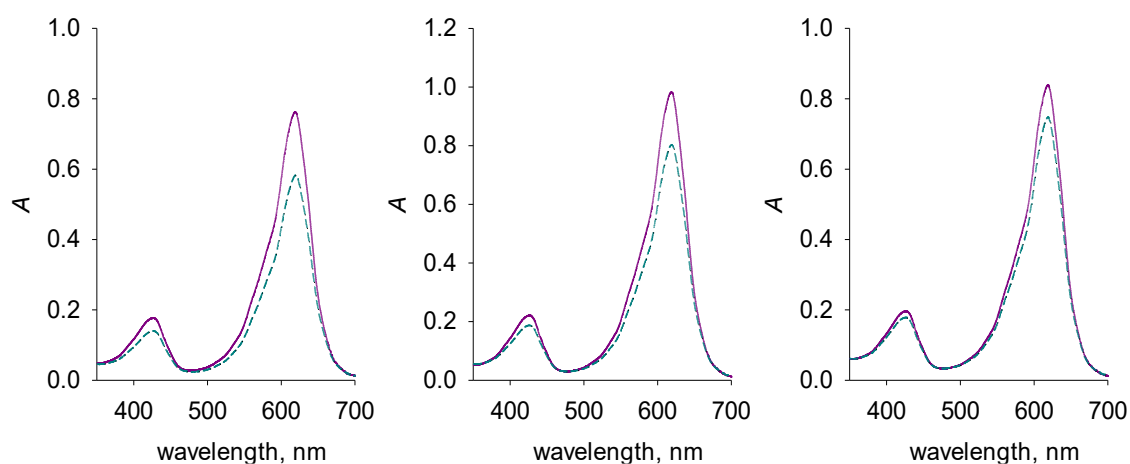

**Fig. S13.** Absorption spectra of MG in a solution of  $4 \times 10^{15}$  PFU/mL MS2 and (left-to-right) 1 mmol/L; 10 mmol/L; and 50 mmol/L  $\text{NaNO}_3$ ; solid line: without added alkali; dashed line: at  $c_{\text{NaOH}} = 0.2$  mmol/L.

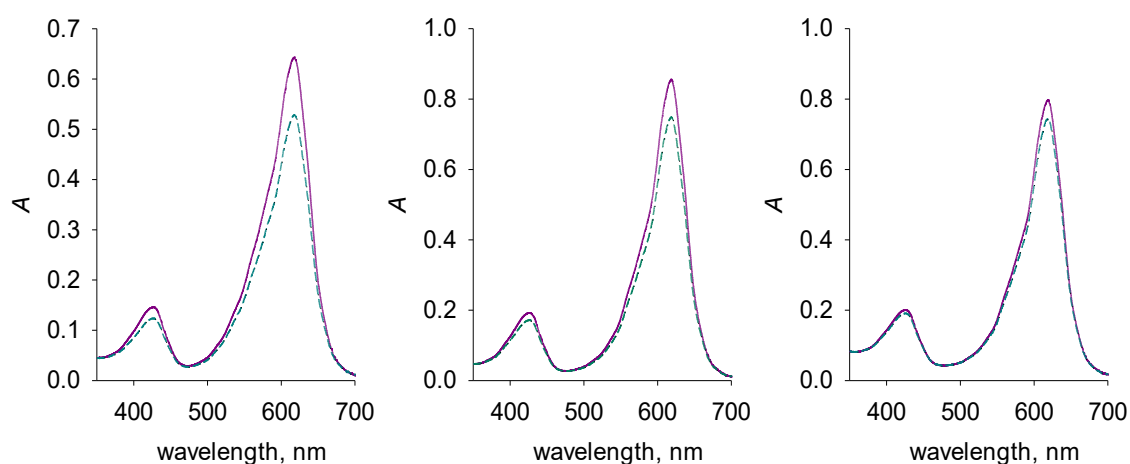

**Fig. S14.** Absorption spectra of MG in a solution of  $4 \times 10^{15}$  PFU/mL MS2 and (left-to-right) 1 mmol/L; 10 mmol/L; and 50 mmol/L  $\text{NaAc}$ ; solid line: without added alkali; dashed line: at  $c_{\text{NaOH}} = 0.2$  mmol/L.

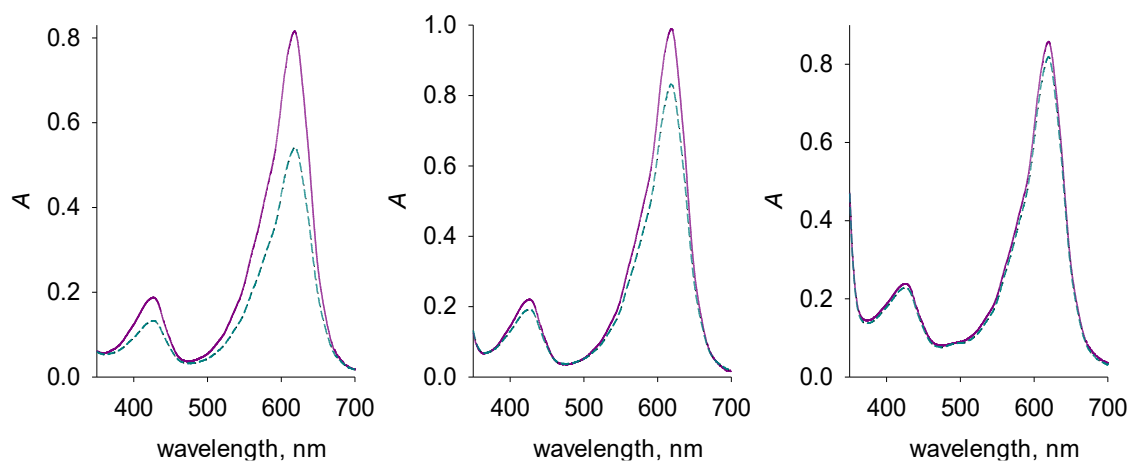

**Fig. S15.** Absorption spectra of MG in a solution of  $4 \times 10^{15}$  PFU/mL MS2 and (left-to-right) 1 mmol/L; 10 mmol/L; and 50 mmol/L  $\text{NaSal}$ ; solid line: without added alkali; dashed line: at  $c_{\text{NaOH}} = 0.2$  mmol/L.

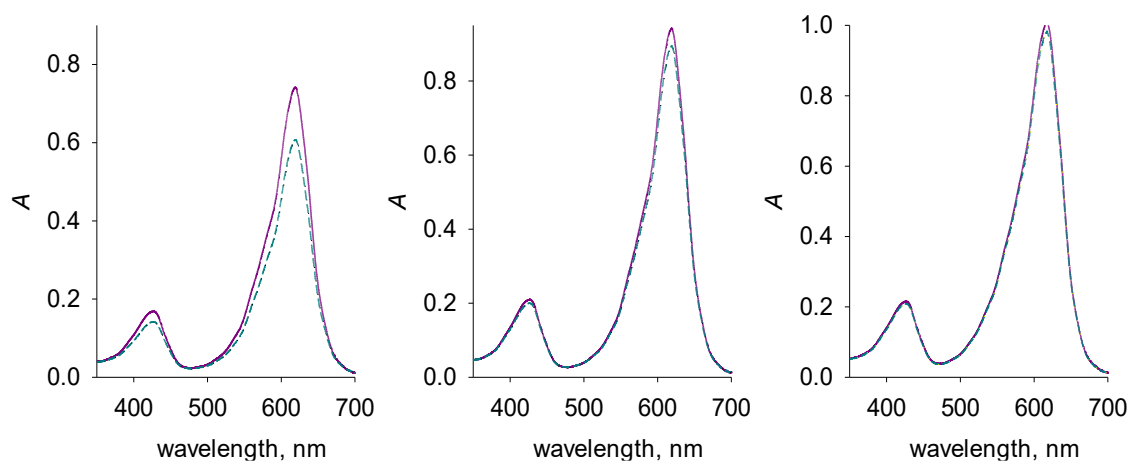

**Fig. S16.** Absorption spectra of MG in a solution of  $4 \times 10^{15}$  PFU/mL MS2 and (left-to-right) 1 mmol/L; 10 mmol/L; and 50 mmol/L NaBut; solid line: without added alkali; dashed line: at  $c_{\text{NaOH}} = 0.2$  mmol/L.

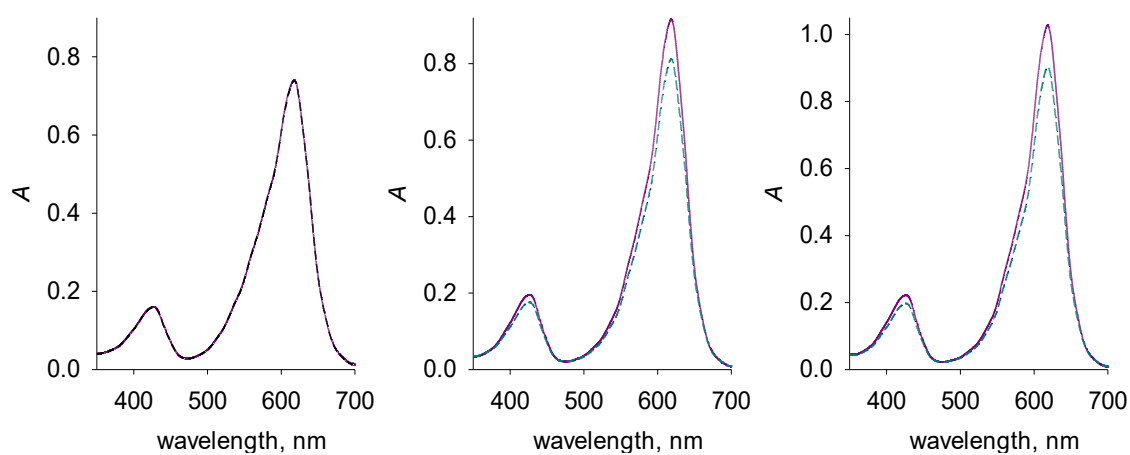

**Fig. S17.** Absorption spectra of MG in a solution of  $4 \times 10^{15}$  PFU/mL MS2 and (left-to-right) 1 mmol/L; 10 mmol/L; and 50 mmol/L NaGly; solid line: without added alkali; dashed line: at  $c_{\text{NaOH}} = 0.2$  mmol/L.

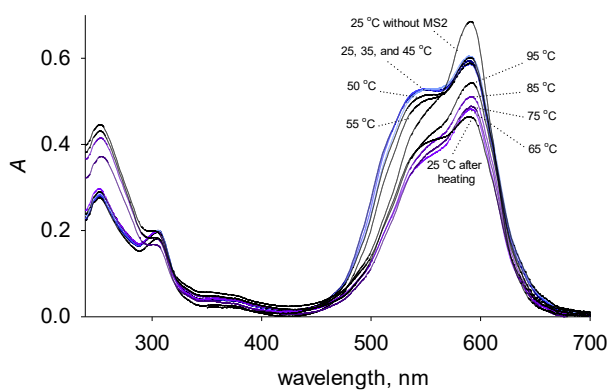

**Fig. S18.** Temperature influence on absorption spectra of CV in a solution of  $4 \times 10^{15}$  PFU/mL MS2 at 0.01 mol/L NaCl.

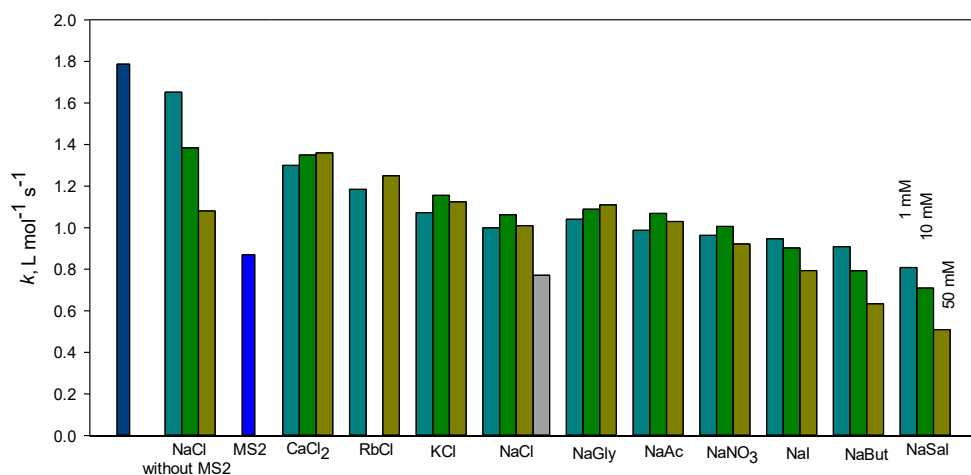

**Fig. S19.** Rate constant values of  $\text{MG}^+ + \text{HO}^-$  reaction in 1, 10, 50, and 100 mmol/L salts solutions of  $4 \times 10^{15}$  PFU/mL MS2 at 25 °C and  $c_{\text{NaOH}} = 0.2$  mmol/L as well as without MS2 for comparison.

## References

- (1) Ni, C. Z.; White, C. A.; Mitchell, R. S.; Wickersham, J.; Kodandapani, R.; Peabody, D. S.; Ely, K. R. Crystal structure of the coat protein from the GA bacteriophage: model of the unassembled dimer. *Protein science* **1996**, 5 (12), 2485–2493.
- (2) Cooper, G. M.; Hausman, R. E. *The cell: a molecular approach*; Artmed Editora, 2016.
- (3) Kyte, J.; Doolittle, R. F. A simple method for displaying the hydrophobic character of a protein. *Journal of molecular biology* **1982**, 157 (1), 105–132.
- (4) Sabnis, R. W. *Handbook of biological dyes and stains: synthesis and industrial applications*; John Wiley & Sons, 2010.
